# Supplementary material for: Solvation parameters for the 209 PCBs: calculation of physicochemical properties
Source: Royal Society of Chemistry journal article supplement (doi:10.1039/b415899g), 2005-01-01
Supplement: b415899g.pdf [file b415899g.pdf]

**Solvation parameters for the 209 PCBs: calculation of physicochemical properties****Michael H. Abraham \* and Amal J. M. Al- Hussaini***Department of Chemistry, University College London, 20 Gordon Street, London, UK**WC1H 0AJ. E-Mail: m.h.abraham@ucl.ac.uk*

---

**Supplimentary material: Tables S1 to S5.**

**Table S1.** Observed<sup>25</sup> and predicted values of the water to hexane partition coefficient, as log P<sub>6</sub>

| PCB | Obs               | Pred |
|-----|-------------------|------|
| 1   | 4.76 <sup>a</sup> | 4.71 |
| 29  | 5.76              | 5.72 |
| 52  | 6.28              | 6.08 |
| 155 | 6.50              | 7.01 |
| 209 | 7.14              | 9.02 |

<sup>a</sup> Observed value for water-to-heptane partition (3)

This journal is © The Royal Society of Chemistry 2005

**Table S2.** Comparison of observed and predicted values of water solubility, as log Sw (mol dm<sup>-3</sup>) at 298 K

| PCB | Log Sw <sup>a</sup> |                  |                  |       |
|-----|---------------------|------------------|------------------|-------|
|     | HM <sup>7</sup>     | LDV <sup>5</sup> | FAV <sup>5</sup> | Pred  |
| 3   | -5.16               | -4.76            | -4.69            | -4.93 |
| 8   | -5.28               | -5.13            | -5.19            | -5.41 |
| 15  | -6.56               | -5.30            | -5.37            | -5.50 |
| 28  | -5.98               | -6.00            | -6.05            | -6.00 |
| 29  | -6.20               | -5.74            | -5.82            | -6.01 |
| 31  | -6.41               | -6.07            | -6.12            | -6.01 |
| 52  | -7.04               | -6.17            | -6.32            | -6.50 |
| 61  | -7.32               | -6.44            | -6.46            | -6.59 |
| 101 | -7.51               | -6.98            | -6.99            | -7.06 |
| 105 | -7.98               | -6.95            | -7.13            | -7.13 |
| 118 | -7.39               | -7.05            | -7.17            | -7.15 |
| 138 | -7.69               | -7.68            | -7.73            | -7.63 |
| 153 | -8.57               | -7.42            | -7.51            | -7.63 |
| 155 | -8.20               | -7.41            | -7.42            | -7.57 |
| 180 | -8.01               | -8.10            | -7.88            | -8.16 |
| 194 | -9.20               | -8.05            | -8.25            | -8.81 |
| 206 | -10.27              | -9.62 (8)        | -9.77 (30)       | -9.36 |
| 207 |                     |                  |                  | -9.33 |
| 208 | -10.41 (10)         |                  |                  | -9.34 |
| 209 | -10.83 (10)         | -9.00 (8)        | -10.37 (30)      | -9.90 |

<sup>a</sup> Columns 2-4 list observed values from the quoted references, and in column 5

are given our predicted values on eqn. (9).

This journal is © The Royal Society of Chemistry 2005

**Table S3.** Comparison of observed and predicted values of the gas to water partition coefficient, as log Kw, at 298 K

| PCB | (7)  | (4)  | LDV<br>(5)        | FAV<br>(5) | LogP16 | L      | Pred<br>eqn. (10) |
|-----|------|------|-------------------|------------|--------|--------|-------------------|
| 3   | 1.24 | 2.06 | 1.84              | 2.02       | 4.93   | 6.718  | 1.79              |
| 8   | 1.67 | 1.98 | 1.98              | 2.04       | 5.31   | 7.197  | 1.89              |
| 15  | 0.99 | 2.09 | 2.24              | 2.27       | 5.45   | 7.580  | 2.13              |
| 28  | 2.00 | 1.83 | 1.87              | 1.91       | 5.88   | 7.904  | 2.03              |
| 29  | 1.08 | 1.83 | 1.88              | 1.91       | 5.88   | 7.722  | 1.84              |
| 31  | 1.26 | 1.91 | 1.83              | 1.86       | 5.88   | 7.862  | 1.98              |
| 52  |      | 1.90 | 1.94              | 1.99       | 6.27   | 8.144  | 1.87              |
| 61  | 1.38 | 1.85 | 2.08              | 2.09       | 6.41   | 8.687  | 2.27              |
| 101 | 1.35 | 1.76 | 1.90              | 2.01       | 6.79   | 8.868  | 2.07              |
| 105 | 1.47 | 1.86 | 1.87              | 2.25       | 6.92   | 9.594  | 2.67              |
| 118 | 1.93 | 1.83 | 1.89              | 2.23       | 6.94   | 9.396  | 2.46              |
| 138 | 2.00 | 1.74 | 1.80              | 1.92       | 7.32   | 9.772  | 2.45              |
| 153 | 1.16 | 1.66 | 2.00              | 2.10       | 7.32   | 9.587  | 2.27              |
| 155 | 0.99 | 1.48 | 1.51              | 1.43       | 7.28   | 8.715  | 1.44              |
| 180 | 2.27 | 1.82 | 2.63              | 2.48       | 7.82   | 10.415 | 2.59              |
| 194 |      | 2.36 | 2.56              | 2.75       | 8.43   | 11.186 | 2.76              |
|     |      |      |                   |            |        |        |                   |
| 206 |      | 2.22 | 4.09 <sup>a</sup> |            | 8.94   | 11.450 | 2.51              |
| 207 |      | 1.41 | 2.23 <sup>a</sup> |            | 8.92   | 10.904 | 1.99              |
| 208 |      | 1.41 | 2.46 <sup>a</sup> |            | 8.92   | 10.922 | 2.00              |
| 209 | 0.42 | 1.41 | 4.28 <sup>a</sup> |            | 9.45   | 11.703 | 2.26              |

<sup>a</sup> Calculated values, ref. (32)

This journal is © The Royal Society of Chemistry 2005

**Table S4.** Comparison of observed and predicted values of the gas to dry octanol partition coefficient, as log  $K_{oct}$ , at 298 K

| PCB | 34, 38 | 35   | 36 <sup>a</sup> | 37   | 39 <sup>a</sup> | LDV<br>(5) | FAV<br>(5) | Pred |
|-----|--------|------|-----------------|------|-----------------|------------|------------|------|
| 3   | 6.82   |      | 6.79            | 6.93 | 6.92            | 6.82       | 6.78       | 6.60 |
| 8   |        |      | 7.39            |      | 7.05            | 7.40       | 7.34       | 7.11 |
| 15  | 7.67   |      | 7.65            | 7.77 | 7.89            | 7.65       | 7.85       | 7.44 |
| 18  |        | 7.60 | 7.58            |      | 7.29            |            |            | 7.42 |
| 28  |        |      | 8.16            |      | 7.94            | 7.93       | 7.85       | 7.79 |
| 29  | 7.82   |      | 7.80            | 8.03 | 8.06            | 7.80       | 7.78       | 7.62 |
| 31  |        |      | 8.16            |      | 7.98            | 7.93       | 7.94       | 7.75 |
| 44  |        | 8.36 | 8.49            |      | 8.48            |            |            | 8.23 |
| 49  | 8.39   |      | 8.43            |      | 8.12            |            |            | 8.12 |
| 52  |        | 8.22 | 8.27            | 8.44 | 8.01            | 8.22       | 8.22       | 8.08 |
| 53  | 8.03   |      | 7.95            |      | 7.75            |            |            | 7.90 |
| 61  | 8.73   |      | 8.64            |      | 8.77            | 8.64       | 8.55       | 8.56 |
| 64  |        | 8.41 | 8.40            | 8.75 | 8.41            |            |            | 8.27 |
| 66  | 9.01   |      | 9.05            |      | 9.13            |            |            | 8.59 |
| 77  | 9.70   |      | 9.69            |      | 9.47            |            |            | 9.01 |
| 95  | 8.80   | 8.71 | 8.83            |      | 8.82            |            |            | 8.57 |
| 96  | 8.53   |      | 8.54            |      | 8.54            |            |            | 8.39 |
| 101 | 9.06   |      | 9.06            | 9.05 | 9.11            | 8.90       | 8.79       | 8.79 |
| 105 | 10.01  |      | 9.92            |      | 9.94            | 10.01      | 9.45       | 9.44 |
| 110 |        | 9.06 | 9.34            |      | 9.02            |            |            | 9.06 |
| 118 | 9.81   |      | 9.79            |      | 9.66            | 9.82       | 9.36       | 9.25 |
| 126 | 10.35  |      | 10.42           |      | 10.38           |            |            | 9.68 |

This journal is © The Royal Society of Chemistry 2005

|     |       |      |       |                    |       |       |       |       |
|-----|-------|------|-------|--------------------|-------|-------|-------|-------|
| 138 | 9.81  |      | 9.94  |                    | 9.83  | 9.76  | 9.66  | 9.66  |
| 149 |       | 9.27 | 9.49  |                    | 9.50  |       |       | 9.27  |
| 153 | 9.73  | 9.37 | 9.75  | 9.65               | 9.77  | 9.52  | 9.44  | 9.49  |
| 155 | 8.99  |      | 8.89  |                    | 9.04  | 8.89  | 9.14  | 8.68  |
| 171 | 10.25 |      | 10.22 |                    | 10.40 |       |       | 9.94  |
| 180 | 10.52 | 9.88 | 10.44 |                    | 10.75 | 10.14 | 10.16 | 10.31 |
| 187 |       | 9.87 | 9.95  |                    | 10.30 |       |       | 9.78  |
| 194 |       |      | 11.31 |                    | 11.07 | 11.30 | 11.13 | 11.04 |
|     |       |      |       |                    |       |       |       |       |
| 206 |       |      | 11.49 | 11.51 <sup>b</sup> | 11.62 |       |       | 11.32 |
| 207 |       |      | 10.95 | 11.61 <sup>b</sup> | 11.55 |       |       | 10.82 |
| 208 |       |      | 10.96 | 11.40 <sup>b</sup> | 11.44 |       |       | 10.83 |
| 209 |       |      | 11.64 | 11.96 <sup>b</sup> | 12.12 |       |       | 11.60 |

<sup>a</sup> Most of these values are predicted, including those for PCB206-PCB209. <sup>b</sup> Predicted values.<sup>38</sup>

This journal is © The Royal Society of Chemistry 2005

**Table S5.** Comparison of log K<sub>oct</sub> for gas to dry octanol partition, with log K<sub>oct</sub>(wet) for gas to wet octanol partition, calculated from log K<sub>w</sub> and log P<sub>oct</sub>, and through eqn. (11), at 298 K.

| PCB | LDV   |       | FAV   |       | Predictions      |       | Eq (11)          |
|-----|-------|-------|-------|-------|------------------|-------|------------------|
|     | Wet   | Dry   | Wet   | Dry   | Wet <sup>a</sup> | Dry   | Wet <sup>b</sup> |
| 3   | 6.33  | 6.82  | 6.67  | 6.78  | 6.50             | 6.60  | 6.51             |
| 8   | 7.07  | 7.40  | 7.16  | 7.34  | 6.99             | 7.11  | 7.02             |
| 15  | 7.64  | 7.65  | 7.63  | 7.85  | 7.33             | 7.44  | 7.30             |
| 28  | 7.42  | 7.93  | 7.57  | 7.85  | 7.63             | 7.79  | 7.66             |
| 29  | 7.62  | 7.80  | 7.51  | 7.78  | 7.45             | 7.62  | 7.51             |
| 31  | 7.62  | 7.93  | 7.64  | 7.94  | 7.59             | 7.75  | 7.63             |
| 52  | 7.96  | 8.22  | 7.90  | 8.22  | 7.87             | 8.08  | 7.98             |
| 61  | 8.25  | 8.64  | 8.20  | 8.55  | 8.37             | 8.56  | 8.38             |
| 101 | 8.05  | 8.90  | 8.34  | 8.79  | 8.55             | 8.79  | 8.65             |
| 105 | 8.48  | 10.01 | 9.07  | 9.45  | 9.23             | 9.44  | 9.21             |
| 118 | 8.38  | 9.82  | 8.92  | 9.36  | 9.03             | 9.25  | 9.04             |
| 138 | 8.80  | 9.76  | 9.13  | 9.66  | 9.40             | 9.66  | 9.47             |
| 153 | 8.71  | 9.52  | 8.97  | 9.44  | 9.22             | 9.49  | 9.32             |
| 155 | 8.87  | 8.89  | 8.61  | 9.14  | 8.35             | 8.68  | 8.59             |
| 180 | 9.83  | 10.14 | 9.64  | 10.13 | 10.01            | 10.31 | 10.07            |
| 194 | 10.23 | 11.30 | 10.51 | 11.13 | 10.71            | 11.04 | 10.77            |
|     |       |       |       |       |                  |       |                  |
| 206 |       |       |       |       | 10.93            | 11.32 | 11.06            |
| 207 |       |       |       |       | 10.39            | 10.82 | 10.60            |
| 208 |       |       |       |       | 10.41            | 10.83 | 10.62            |
| 209 |       |       |       |       | 11.14            | 11.60 | 11.34            |

<sup>a</sup> Indirect predictions, see text. <sup>b</sup> Direct predictions through eq 11.
